# Supplementary material for: Association between levels of persistent organic pollutants in adipose tissue and cryptorchidism in early childhood: a case–control study
Source: Environ Health. 2015 Sep 24;14:78. doi: 10.1186/s12940-015-0065-0 (PMC4583064; doi:10.1186/s12940-015-0065-0)
Supplement: Additional file 1: Table S1. — Number and percentage of PCBs, PCDD/F, and PBDE congeners above LOQ (Limit of Quantification) in adipose tissue samples. (XLSX 43 kb) [file 12940_2015_65_MOESM1_ESM.xlsx]

## Sheet: Taulukko1
Additional File 1
Number and percentage of PCBs, PCDD/F, and PBDE congeners above LOQ in adipose tissue samples
Congener	N	%	Congener	N	%
PCB 18	6	7	2,3,7,8- Tetrachlorodibenzofuran (TCDF)	3	4
PCB 28/31	74	90	2,3,7,8-Tetrachlorodibenzo-p-dioxin (TCDD)	23	28
PCB 33	6	7	1,2,3,7,8- Pentachlorodibenzofuran	2	2
PCB 47	64	78	2,3,4,7,8- Pentachlorodibenzofuran	65	79
PCB 49	12	15	1,2,3,7,8-Pentachlorodibenzo-p-dioxin	40	49
PCB 51	5	6	1,2,3,4,7,8-Hexachlorodibenzofuran	40	49
PCB 52	63	77	1,2,3,6,7,8-Hexachlorodibenzofuran	42	51
PCB 60	65	79	2,3,4,6,7,8-Hexachlorodibenzofuran	8	10
PCB 66	78	95	1,2,3,7,8,9-Hexachlorodibenzofuran	0	0
PCB 74	82	100	1,2,3,4,7,8-Hexachlorodibenzo-p-dioxin	12	13
PCB 77	34	41	1,2,3,6,7,8- Hexachlorodibenzo-p-dioxin	64	78
PCB 81	24	29	1,2,3,7,8,9- Hexachlorodibenzo-p-dioxin	14	17
PCB 99	82	100	1,2,3,4,6,7,8- Heptachlorodibenzofuran	59	72
PCB 101	74	90	1,2,3,4,7,8,9- Heptachlorodibenzofuran	0	0
PCB 105	78	95	1,2,3,4,6,7,8-Heptachlorodibenzo-p-dioxin	52	63
PCB 110	42	51	Octachlorodibenzofuran	1	1
PCB 114	67	82	Octachlorodibenzo-p-dioxin	75	91
PCB 118	82	100	Any PCDD/F congener	77	94
PCB 122	0	0
PCB 123	59	72	BDE 28	27	33
PCB 126	78	95	BDE 47	81	99
PCB 128	68	83	BDE 66	11	13
PCB 138	82	100	BDE 71	0	0
PCB 141	37	45	BDE 75	3	4
PCB 153	82	100	BDE 77	0	0
PCB 156	81	99	BDE 85	19	23
PCB 157	74	90	BDE 99	81	99
PCB 167	78	95	BDE 100	81	99
PCB 169	77	94	BDE 119	1	1
PCB 170	81	99	BDE 154	37	45
PCB 180	82	100	BDE 153	82	100
PCB 183	82	100	BDE 138	0	0
PCB 187	81	99	BDE 183	41	50
PCB 189	71	87	Any PBDE congener	82	100
PCB 194	78	95
PCB 206	50	61
PCB 209	43	52
Any PCB congener	82	100
